# Supplementary material for: Prediction of S -nitrosylation sites by integrating support vector machines and random forest
Source: Royal Society of Chemistry journal article supplement (doi:10.1039/c9mo00098d), 2019-11-01
Supplement: c9mo00098d1.pdf [file c9mo00098d1.pdf]

**Supplementary Information**

**Prediction of S-nitrosylation Sites by Integrating Support Vector  
Machine and Random Forest**

**Md. Mehedi Hasan<sup>a</sup>, Balachandran Manavalan<sup>b</sup>, Mst. Shamima Khatun<sup>a</sup>, and  
Hiroyuki Kurata<sup>a,c\*</sup>**

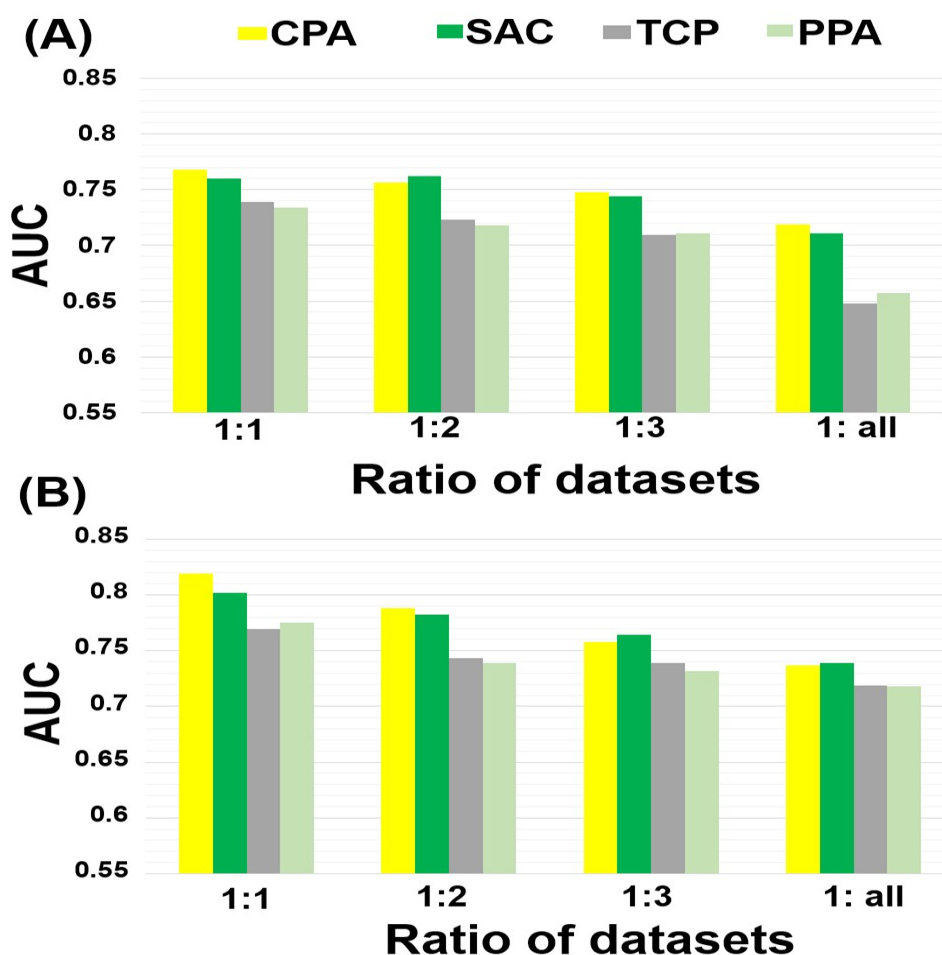

**Figure S1.** Effect of the ratio of positive vs negative training datasets on prediction performances by the ML models with a single encoding scheme of the CPA, SAC, TCP, or PPA.

(A) AUC values provided by the SVM. (B) AUC values provided by the RF

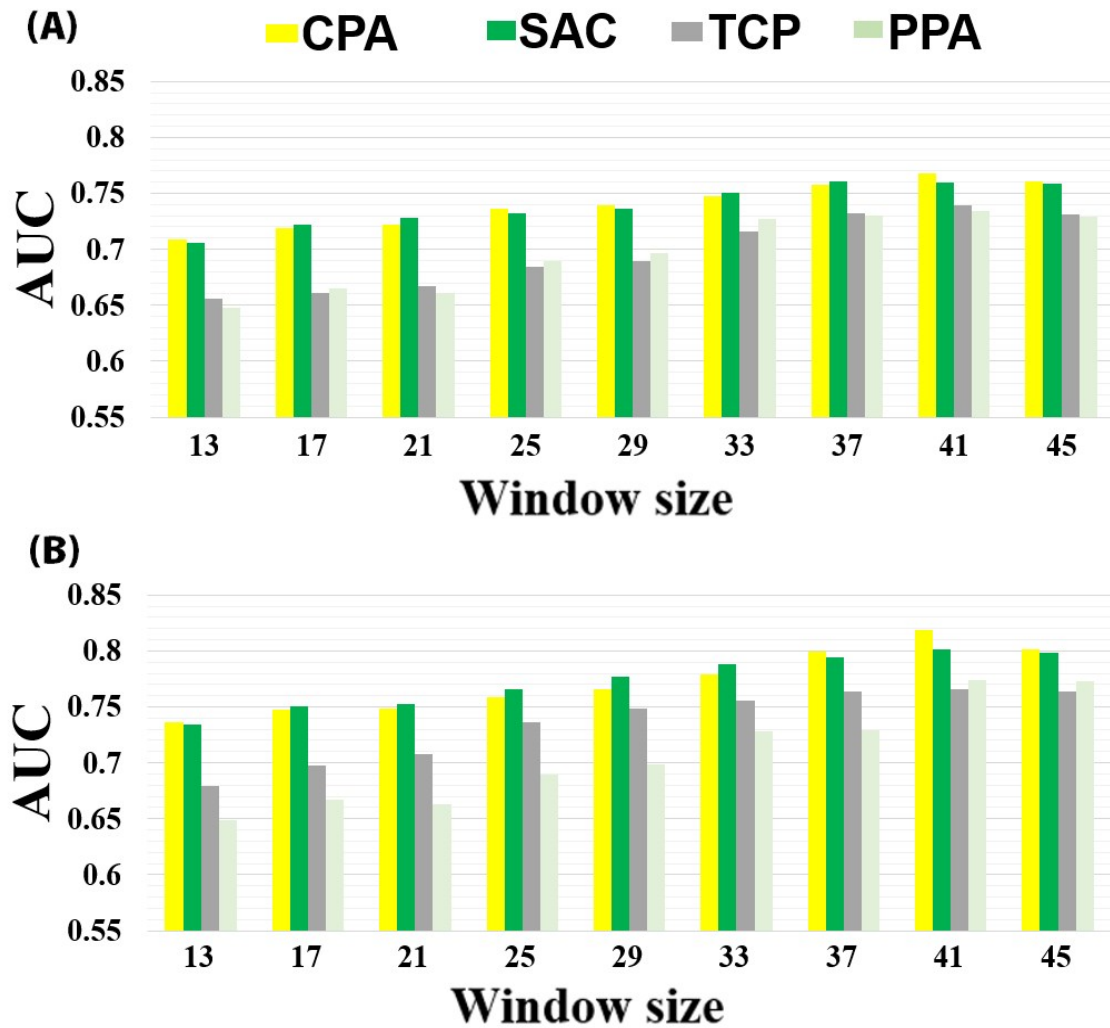

**Figure S2.** Effect of window sizes on the AUC values by a single encoding scheme of the CPA, SAC, TCP, or PPA on the training datasets by 5-fold CV test.

(A) SVM and (B) RF algorithms.

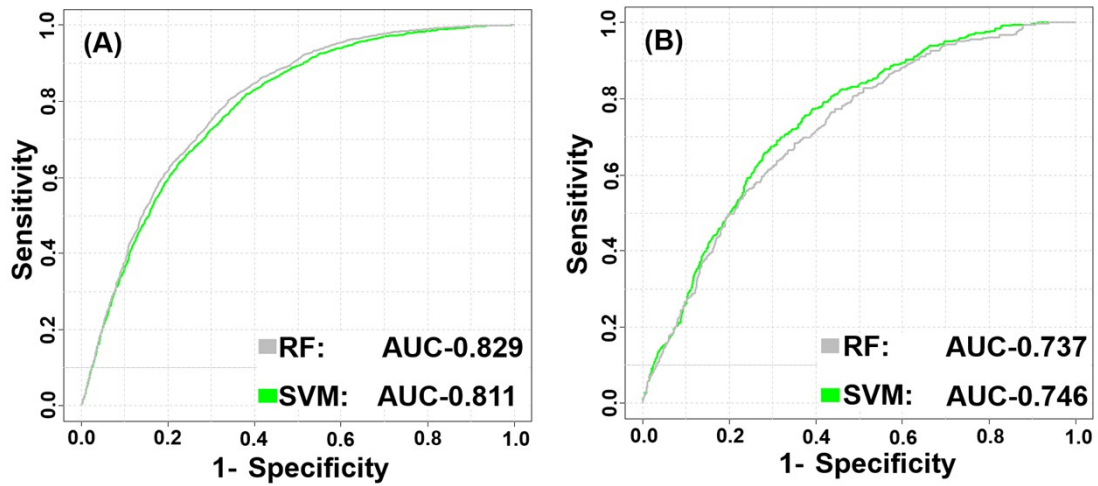

**Figure S3.** Prediction performance provided by the RF and SVM with the sequential combination of the CPA, SAC, TCP, and PPA. (A) Training data. (B) Independent data.

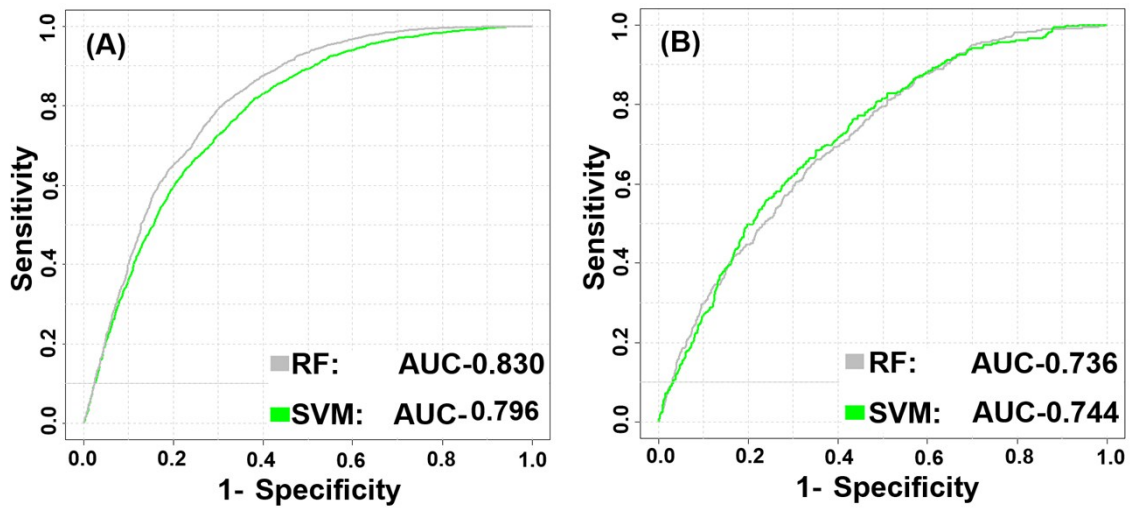

**Figure S4.** Prediction performance by the meta-classifiers of the SVM and RF. (A) Training data. (B) Independent data.

**Table S1.** Selected amino acid index properties for the PPA encoding scheme.

| PPA property | Amino acid index properties |        |        |        |        |        |        |
|--------------|-----------------------------|--------|--------|--------|--------|--------|--------|
| BLAM930101   | 0.96                        | 0.77   | 0.39   | 0.42   | 0.42   | 0.80   | 0.53   |
|              | 0.00                        | 0.57   | 0.84   | 0.92   | 0.73   | 0.86   | 0.59   |
|              | -2.50                       | 0.53   | 0.54   | 0.58   | 0.72   | 0.63   |        |
| MAXF760101   | 1.43                        | 1.18   | 0.64   | 0.92   | 0.94   | 1.22   | 1.67   |
|              | 0.46                        | 0.98   | 1.04   | 1.36   | 1.27   | 1.53   | 1.19   |
|              | 0.49                        | 0.70   | 0.78   | 1.01   | 0.69   | 0.98   |        |
| TSAJ990101   | 89.3                        | 190.3  | 122.4  | 114.4  | 102.5  | 146.9  | 138.8  |
|              | 63.8                        | 157.5  | 163.0  | 163.1  | 165.1  | 165.8  | 190.8  |
|              | 121.6                       | 94.2   | 119.6  | 226.4  | 194.6  | 138.2  |        |
| NAKH920108   | 9.36                        | 0.27   | 2.31   | 0.94   | 2.56   | 1.14   | 0.94   |
|              | 6.17                        | 0.47   | 13.73  | 16.64  | 0.58   | 3.93   | 10.99  |
|              | 1.96                        | 5.58   | 4.68   | 2.20   | 3.13   | 12.43  |        |
| CEDJ970104   | 7.9                         | 4.9    | 4.0    | 5.5    | 1.9    | 4.4    | 7.1    |
|              | 7.1                         | 2.1    | 5.2    | 8.6    | 6.7    | 2.4    | 3.9    |
|              | 5.3                         | 6.6    | 5.3    | 1.2    | 3.1    | 6.8    |        |
| LIFS790101   | 0.92                        | 0.93   | 0.60   | 0.48   | 1.16   | 0.95   | 0.61   |
|              | 0.61                        | 0.93   | 1.81   | 1.30   | 0.70   | 1.19   | 1.25   |
|              | 0.40                        | 0.82   | 1.12   | 1.54   | 1.53   | 1.81   |        |
| NOZY710101   | 0.5                         | 0.0    | 0.0    | 0.0    | 0.0    | 0.0    | 0.0    |
|              | 0.0                         | 0.5    | 1.8    | 1.8    | 0.0    | 1.3    | 2.5    |
|              | 0.0                         | 0.0    | 0.4    | 3.4    | 2.3    | 1.5    |        |
| HUTJ700103   | 154.33                      | 341.01 | 207.90 | 194.91 | 219.79 | 235.51 | 223.16 |
|              | 127.90                      | 242.54 | 233.21 | 232.30 | 300.46 | 202.65 | 204.74 |
|              | 179.93                      | 174.06 | 205.80 | 237.01 | 229.15 | 207.60 |        |
| NAKH900109   | 9.25                        | 3.96   | 3.71   | 3.89   | 1.07   | 3.17   | 4.80   |
|              | 8.51                        | 1.88   | 6.47   | 10.94  | 3.50   | 3.14   | 6.36   |
|              | 4.36                        | 6.26   | 5.66   | 2.22   | 3.28   | 7.55   |        |
| BIOV880101   | 16.                         | -70.   | -74.   | -78.   | 168.   | -73.   | -106.  |
|              | -13.                        | 50.    | 151.   | 145.   | -141.  | 124.   | 189.   |
|              | -20.                        | -70.   | -38.   | 145.   | 53.    | 123.   |        |
| MIYS990104   | -0.04                       | 0.07   | 0.13   | 0.19   | -0.38  | 0.14   | 0.23   |
|              | 0.09                        | -0.04  | -0.34  | -0.37  | 0.33   | -0.30  | -0.38  |
|              | 0.19                        | 0.12   | 0.03   | -0.33  | -0.29  | -0.29  |        |

|            |         |         |         |         |         |        |         |
|------------|---------|---------|---------|---------|---------|--------|---------|
| PUNT030101 | -0.17   | 0.37    | 0.18    | 0.37    | -0.06   | 0.26   | 0.15    |
|            | 0.01    | -0.02   | -0.28   | -0.28   | 0.32    | -0.26  | -0.41   |
|            | 0.13    | 0.05    | 0.02    | -0.15   | -0.09   | -0.17  |         |
| WOEC730101 | 7.0     | 9.1     | 10.0    | 13.0    | 5.5     | 8.6    | 12.5    |
|            | 7.9     | 8.4     | 4.9     | 4.9     | 10.1    | 5.3    | 5.0     |
|            | 6.6     | 7.5     | 6.6     | 5.3     | 5.7     | 5.6    |         |
| BASU050102 | 0.0728  | 0.0394  | -0.0390 | -0.0552 | 0.3557  | 0.0126 | -0.0295 |
|            | -0.0589 | 0.0874  | 0.3805  | 0.3819  | -0.0053 | 0.1613 | 0.4201  |
|            | -0.0492 | -0.0282 | 0.0239  | 0.4114  | 0.3113  | 0.2947 |         |
| SUYM030101 | -0.058  | 0.000   | 0.027   | 0.016   | 0.447   | -0.073 | -0.128  |
|            | 0.331   | 0.195   | 0.060   | 0.138   | -0.112  | 0.275  | 0.240   |
|            | -0.478  | -0.177  | -0.163  | 0.564   | 0.322   | -0.052 |         |

**Table S2.** Top 20 selected features based on the CPA, SAC, TCP, and PPA schemes by the WR test.

| Sequential order | CPA             |                  | SAC             |                  | TCP             |                  | PPA             |                 |
|------------------|-----------------|------------------|-----------------|------------------|-----------------|------------------|-----------------|-----------------|
|                  | <i>p</i> -value | Selected pattern | <i>p</i> -value | Selected pattern | <i>p</i> -value | Selected pattern | <i>p</i> -value | Window position |
| 1                | 6.03E-01        | AL               | 3.06E-03        | LL               | 2.54E-03        | LKK              | 1.35E-02        | (L, -9)         |
| 2                | 7.37E-06        | LL               | 1.63E-04        | L×E              | 6.52E-01        | NRK              | 6.33E-04        | (E, +11)        |
| 3                | 1.42E-04        | K××A             | 1.70E-04        | E×××R            | 2.49E-02        | NLE              | 4.47E-02        | (K, -2)         |
| 4                | 1.63E-05        | Y×E              | 6.52E-02        | E×L              | 9.95E-01        | LIK              | 3.33E-06        | (H, +6)         |
| 5                | 8.61E-01        | R×××E            | 3.47E-02        | L×G              | 2.56E-01        | DER              | 5.44E-01        | (D, -3)         |
| 6                | 6.90E-01        | LA               | 8.41E-02        | LA               | 9.37E-01        | DAN              | 3.67E-02        | (E, +6)         |
| 7                | 2.54E-03        | A×××L            | 2.28E-03        | AL               | 1.31E-02        | DAV              | 7.57E-02        | (V, -11)        |
| 8                | 9.17E-02        | V×K              | 5.10E-03        | L××××V           | 8.58E-01        | ELL              | 1.14E-03        | (S, -2)         |
| 9                | 6.16E-01        | A××L             | 2.82E-01        | V×K              | 9.38E-01        | LLL              | 3.11E-03        | (T, -12)        |
| 10               | 3.67E-01        | KV               | 3.22E-02        | E××R             | 4.25E-01        | LAK              | 7.88E-02        | (R, +6)         |
| 11               | 2.58E-01        | E×××R            | 2.24E-07        | K×L              | 9.84E-01        | ELE              | 3.15E-02        | (P, +8)         |
| 12               | 3.19E-01        | W×Y              | 5.96E-04        | E××××L           | 4.081E-04       | DKL              | 1.02E-03        | (V, -15)        |
| 13               | 8.25E-05        | L××××A           | 2.68E-02        | R×××E            | 7.25E-01        | FKS              | 4.11E-02        | (P, +2)         |
| 14               | 1.39E-03        | L×××V            | 5.20E-01        | L×××A            | 7.95E-05        | GLK              | 3.49E-02        | (K, +10)        |
| 15               | 2.61E-01        | S×P              | 9.10E-02        | R×L              | 8.29E-01        | AAA              | 7.46E-02        | (E, +7)         |
| 16               | 3.16E-02        | KK               | 7.09E-04        | KV               | 9.8E-03         | EKK              | 5.44E-03        | (N, +18)        |
| 17               | 1.15E-07        | LS               | 1.34E-03        | G×L              | 1.17E-01        | ESV              | 3.11E-02        | (Y, -13)        |
| 18               | 6.65E-01        | E×L              | 5.88E-01        | A××L             | 5.89E-08        | AAL              | 3.45E-03        | (R, +11)        |
| 19               | 7.42E-01        | E×××D            | 3.86E-01        | A×K              | 4.98E-02        | ALL              | 2.22E-03        | (G, +16)        |
| 20               | 5.57E-01        | L×G              | 1.08E-03        | A××××L           | 1.49E-02        | DAK              | 2.54E-02        | (L, +9)         |

A *p*-value is calculated by a two-sample *t*-test.

**Table S3.** Comparison of the amino acid residue patterns selected by different encodings.

| Encoding     | CPA   |                                                  | SAC                                                          |                                    | TCP                                           |                | PPA                                                                           |                                                                                                    |
|--------------|-------|--------------------------------------------------|--------------------------------------------------------------|------------------------------------|-----------------------------------------------|----------------|-------------------------------------------------------------------------------|----------------------------------------------------------------------------------------------------|
| Sample       | SNO   | non-SNO                                          | SNO                                                          | non-SNO                            | SNO                                           | non-SNO        | SNO                                                                           | non-SNO                                                                                            |
| Pattern      | AxxxL | LL<br>KxxA<br>YxE<br>LxxxxA<br>LxxxV<br>KK<br>LS | LxG<br>ExxR<br>KxL<br>ExxxxL<br>RxxxE<br>KV<br>GxL<br>AxxxxL | LL<br>LxE<br>ExxxR<br>AL<br>LxxxxV | NLE<br>DKL<br>GLK<br>EKK<br>AAL<br>ALL<br>DAK | LKK<br>DA<br>V | (L, -9)<br>(E, +6)<br>(V, -15)<br>(R, +11)<br>(K, +10)<br>(L, +9)<br>(Y, -13) | (E, +11)<br>(K, -2)<br>(H, +6)<br>(S, -2)<br>(T, -12)<br>(P, +8)<br>(G, +16)<br>(P, +2)<br>(N, 18) |
| #charged     | 0     | 3                                                | 3                                                            | 2                                  | 4                                             | 2              | 3                                                                             | 2                                                                                                  |
| #hydrophobic | 2     | 3                                                | 3                                                            | 3                                  | 3                                             | 3              | 2                                                                             | 2                                                                                                  |
| #polar       | 0     | 1                                                | 0                                                            | 0                                  | 1                                             | 0              | 1                                                                             | 4                                                                                                  |

Blue indicates charged amino acids; red hydrophobic amino acids; black polar amino acids.

#charged, the unique number of charged amino acid containing patterns;

#hydrophobic, the unique number of hydrophobic amino acid containing patterns;

#polar, the unique number of polar amino acid containing patterns.
